# Supplementary material
Source: Springer Nature journal article supplement (https://www.springermedizin.de/resource/supplementary/12933_2010_256_MOESM2_ESM.pdf/9539950)

Carotid Intima Media Thickness (mm)

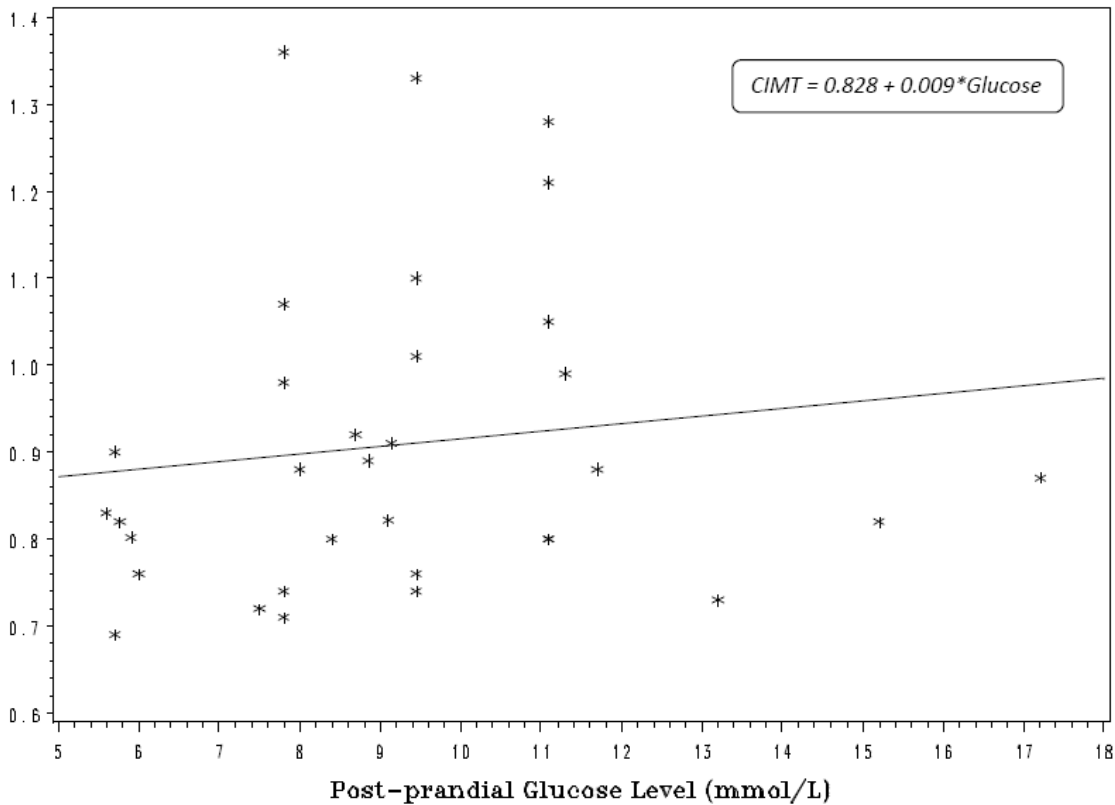

Supplement: MOESM2 [file 9539950]
